# Supplementary material for: Transcriptomic meta-analysis reveals up-regulation of gene expression functional in osteoclast differentiation in human septic shock
Source: PubMed Central journal article supplement (PMC5310888; doi:10.1371/journal.pone.0171689), 2017-02-15
Supplement: pone.0171689.s010.pdf [file pone.0171689.s010.pdf]

| <b>Entrez<br/>Ids</b> | <b>Gene<br/>Symbols</b> | <b>Gene expressed<br/>in Tissues</b>  | <b>Protein levels<br/>in plasma</b> |
|-----------------------|-------------------------|---------------------------------------|-------------------------------------|
| 2209                  | FCGR1A                  | NK Cells                              | Detected                            |
| 2534                  | FCGR2A                  | Monocyte, Whole Blood                 | Detected                            |
| 9846                  | GAB2                    | CD14+ Monocyte, Whole Blood           | Detected                            |
| 3454                  | IFNAR1                  | NK Cells                              | Detected                            |
| 3455                  | IFNAR2                  | Dendritic Cells                       | Detected                            |
| 3459                  | IFNGR1                  | Whole Blood, Monocyte                 | Detected                            |
| 3460                  | IFNGR2                  | NK cells , Monocyte, Whole Blood      | Detected                            |
| 3552                  | IL1A                    | Monocyte                              | Detected                            |
| 3726                  | JUNB                    | Myeloid                               | Detected                            |
| 11027                 | LILRA2                  | Monocyte                              | Detected                            |
| 11026                 | LILRA3                  | Monocyte                              | Detected                            |
| 79168                 | LILRA6                  | Monocyte                              | Detected                            |
| 10288                 | LILRB2                  | Monocyte                              | Detected                            |
| 5594                  | MAPK1                   | CD56+ NK cells, Monocyte, Whole Blood | Detected                            |
| 5595                  | MAPK3                   | Whole Blood, Monocyte                 | Detected                            |
| 4688                  | NCF2                    | Whole Blood, Monocyte                 | Detected                            |
| 4689                  | NCF4                    | Whole Blood, Monocyte                 | Detected                            |
| 4792                  | NFKBIA                  | CD33+ Myeloid                         | Detected                            |
| 126014                | OSCAR                   | Neutrophil                            | Detected                            |
| 5294                  | PIK3CG                  | NK cells, Monocyte, Whole Blood       | Detected                            |
| 5336                  | PLCG2                   | NK Cells                              | Detected                            |
| 140885                | SIRPA                   | Whole Blood                           | Detected                            |
| 55423                 | SYK                     | Whole Blood, Monocyte                 | Detected                            |
| 6688                  | SPI1                    | Whole Blood, Monocyte                 | Detected                            |
| 7305                  | TYROBP                  | Monocyte                              | Detected                            |
